# Supplementary material
Source: Springer Nature journal article supplement (https://www.springermedizin.de/resource/supplementary/13041_2012_194_MOESM8_ESM.pdf/25657704)

## Barnes Circular Maze

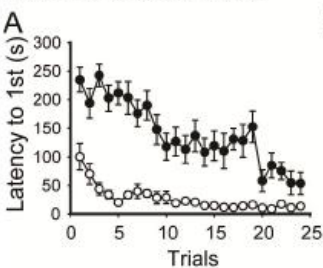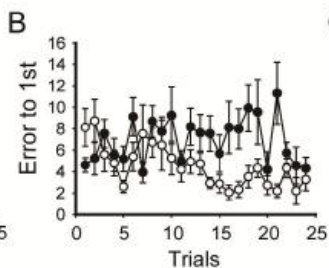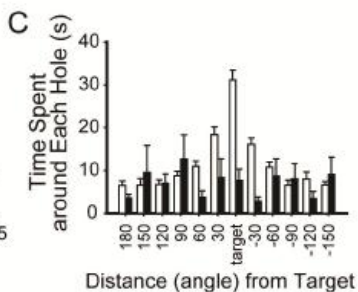

## Eight-arm Radial Maze

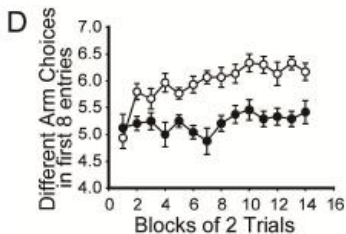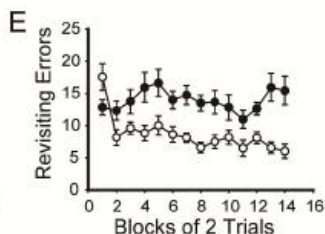

○ WT  
● KI

## Contextual Fear Conditioning Test

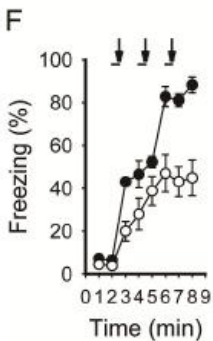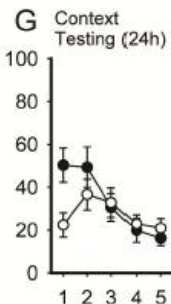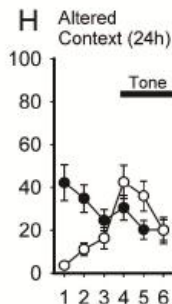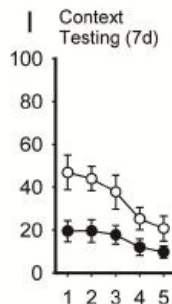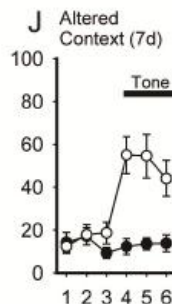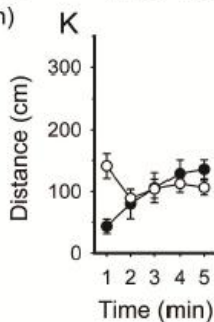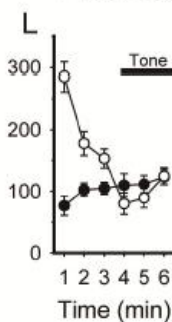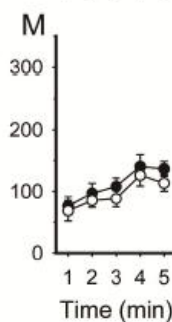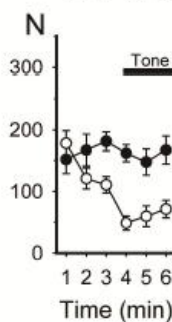

Supplement: MOESM8 [file 25657704]
